# Supplementary material
Source: PubMed Central journal article supplement (PMC3996698)
Supplement: ismej2013222x1.pdf [file ismej2013222x1.pdf]

**Table S1** Number of analyzed clones and phylotypes (defined with 99.0% identity) of 16S rRNA pseudogenes.

|                         | Total<br>number of<br>clones | Total<br>number of<br>phylotypes | Number of<br>K1-type <sup>b</sup><br>clones | Number of<br>K1-type <sup>b</sup><br>phylotypes | Number of<br>K2-type <sup>b</sup><br>clones | Number of<br>K2-type <sup>b</sup><br>phylotypes | Reverse<br>primer<br>for PCR |
|-------------------------|------------------------------|----------------------------------|---------------------------------------------|-------------------------------------------------|---------------------------------------------|-------------------------------------------------|------------------------------|
| Nucleus-1 <sup>a</sup>  | 48                           | 13                               | 48                                          | 13                                              | 0                                           | 0                                               | 1492R                        |
| Nucleus-2 <sup>a</sup>  | 42                           | 9                                | 35                                          | 7                                               | 7                                           | 2                                               | 1492R                        |
| Nucleus-3 <sup>a</sup>  | 22                           | 2                                | 7                                           | 1                                               | 15                                          | 1                                               | 1492R                        |
| Nucleus-6 <sup>a</sup>  | 14                           | 12                               | 14                                          | 12                                              | 0                                           | 0                                               | 1390R                        |
| Nucleus-9 <sup>a</sup>  | 14                           | 6                                | 14                                          | 6                                               | 0                                           | 0                                               | 1492R                        |
| Nucleus-10 <sup>a</sup> | 16                           | 8                                | 15                                          | 8                                               | 0                                           | 0                                               | 1492R                        |
| total                   | 156                          | 47                               | 133                                         | 44                                              | 22                                          | 3                                               |                              |

<sup>a</sup> The identifiers 1–6, 9 and 10 correspond to the clone codes RsTaN1–6 and RsTaN-A, B in Supplementary Figure S2, respectively. Each of the nuclei 1–6 was subjected to WGA, and after that, PCR was performed. For the nuclei 9 and 10, PCR was performed directly, without the WGA step.

<sup>b</sup> K1 and K2 indicate phylotypes RsTaN-K1 and RsTaN-K2 in Figure 2.

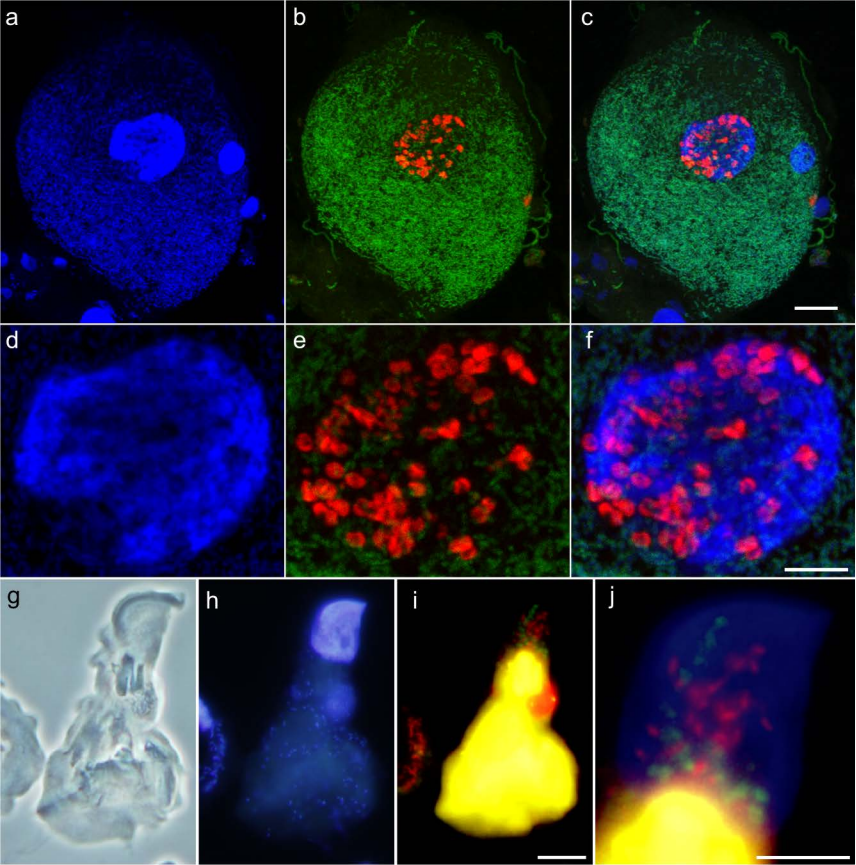

**Figure S1** Detection of verrucomicrobial intranuclear symbionts by FISH. (a–c) Detection in a *Trichonympha agilis* cell and (d–f) its nucleus, observed under a laser scanning microscope. (a, d) DAPI images. (b, e) Merged images of FISH analyses using the Texas-red labeled *Verrucomicrobia*-specific probe EUB338-III (red) or the 6FAM-labeled probe EUB338 specific to *Bacteria* except *Verrucomicrobia* and several other taxa (green). (c, f) DAPI images merged with the FISH signals. (g–j) Detection in a *Pyronympha grandis* cell. (g) Phase contrast image. (h) DAPI-stained image. (i) Merged image of FISH analyses using the Texas-red labeled *Verrucomicrobia*-specific probe EUB338-III (red) or the 6FAM-labeled *Bacteria*-specific probe EUB338 (green). (j) Magnified merged image of panels (h) and (i). Bars represent 10  $\mu\text{m}$  (c, i); 5  $\mu\text{m}$  (f, j).

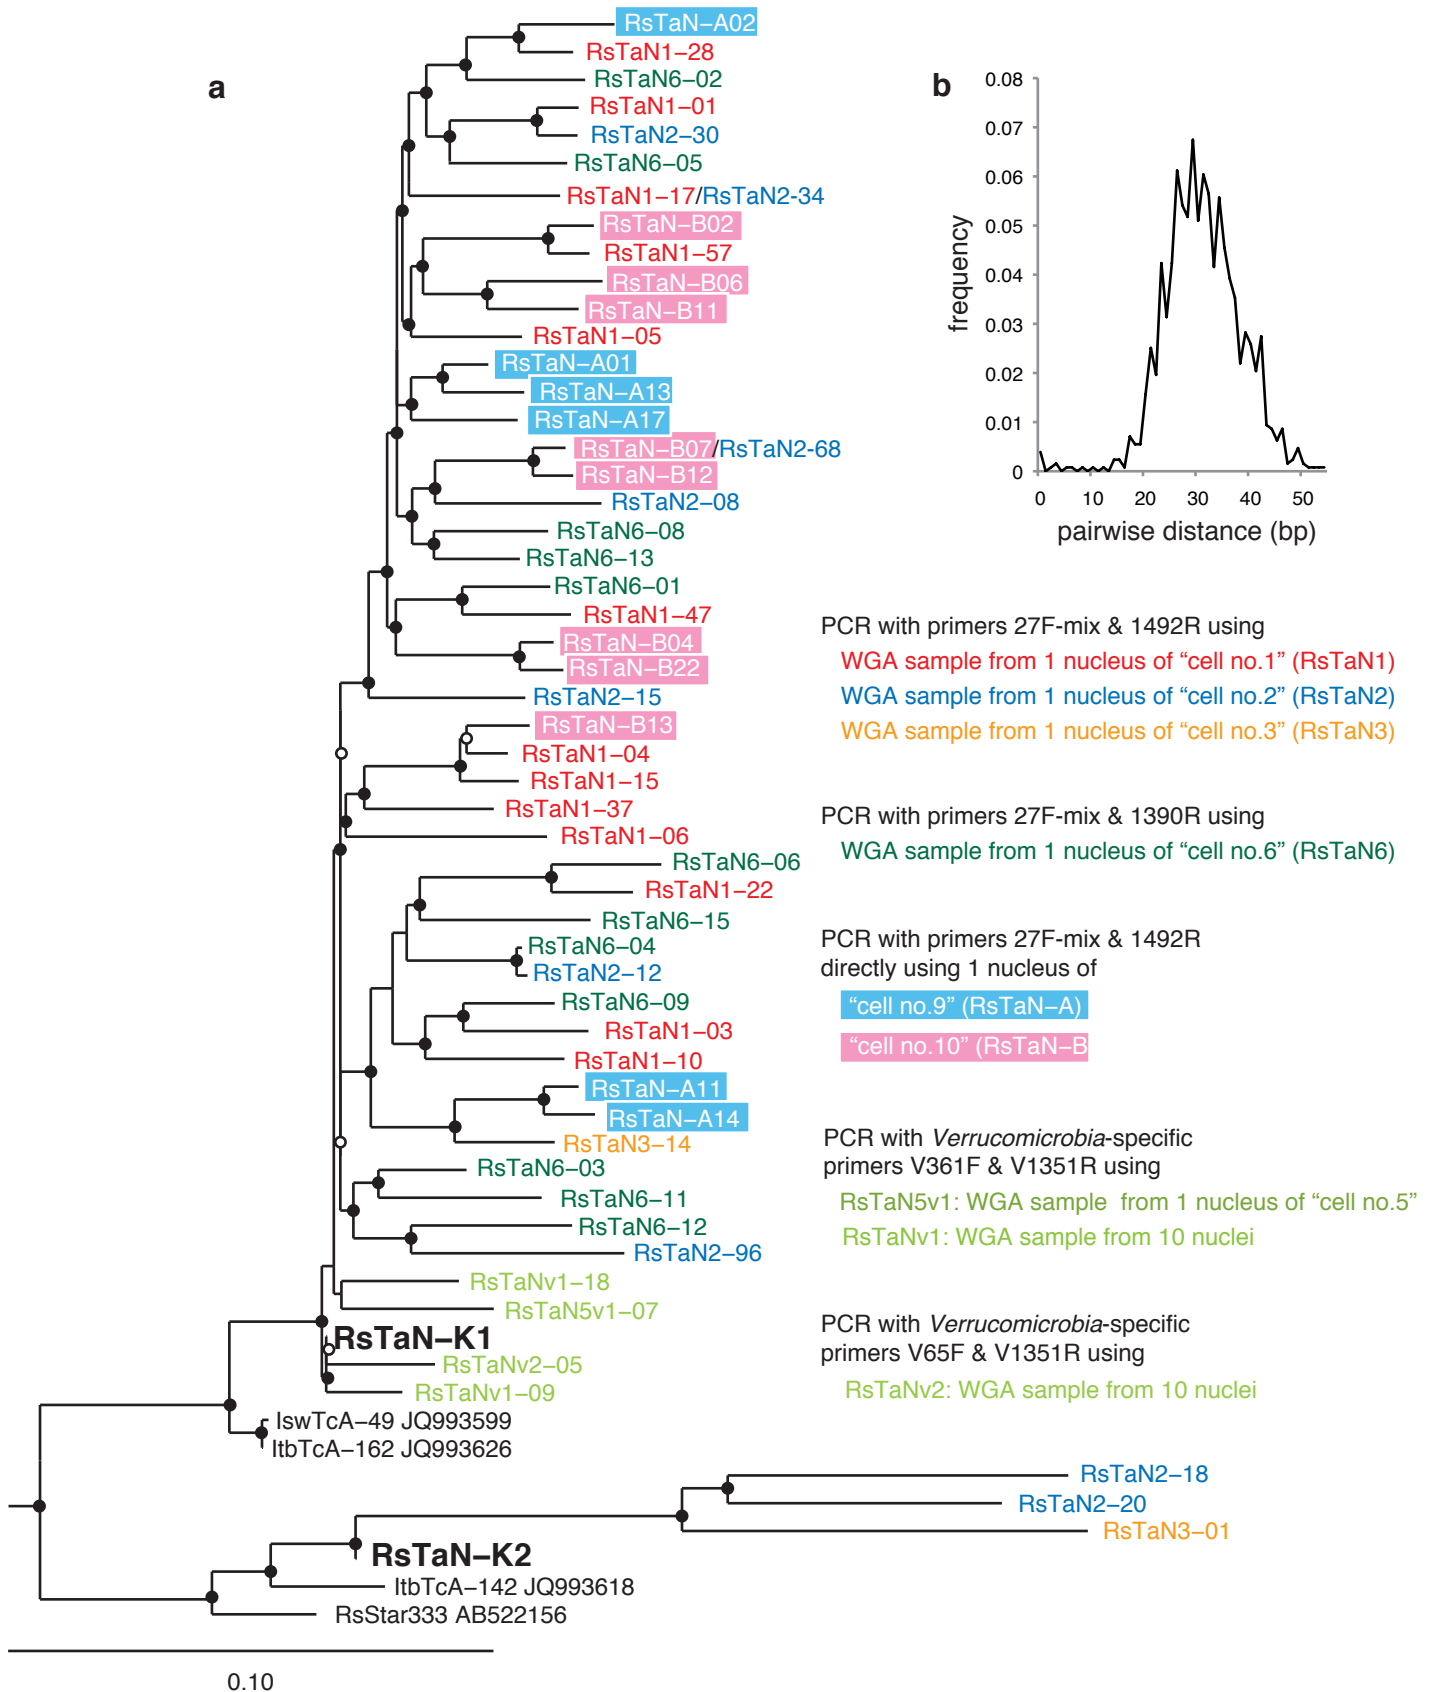

**Figure S2** Phylogenetic relationships among the phylotypes of 16S rRNA pseudogenes. The phylotype was defined with 99.0% sequence identity. **(a)** A maximum likelihood tree. Clones CsOx50 (FN37791), ItbTcA-159 (JQ993624), and CsOx25 (FN37789) were used as outgroups. Open and closed circles at the nodes indicate the bootstrap confidence values of 70–94% and 95–100%, respectively. **(b)** The frequency of pairs of RsTaN-K1-related pseudogene phylotypes with the genetic distances.
